# Supplementary material for: Protective Effects of Protopanaxatriol Saponins on Ulcerative Colitis in Mouse Based on UPLC-Q/TOF-MS Serum and Colon Metabolomics
Source: MDPI journal article supplement (doi:10.3390/molecules27238346), 2022-11-30
Supplement: s1 [file s1]

### Electronic supplementary information

**Table S1.** Regression equations, correlation coefficient, linear ranges, LOD and LOQ data of the two compounds

| compound        | retention<br>time(min) | calibration curves | R <sup>2</sup> | linear<br>rang(μg/ml) | LOD<br>(μg/mL) | LOQ<br>(μg/mL) |
|-----------------|------------------------|--------------------|----------------|-----------------------|----------------|----------------|
| Ginsenoside Rg1 | 26.398                 | Y=1.1317X+2.7718   | 0.9996         | 48.0-480.0            | 6.0            | 15.0           |
| Ginsenoside Re  | 28.598                 | Y=1.2662X+2.4074   | 0.9990         | 56.0-560.0            | 5.6            | 14.0           |

**Table S2.** Precision, repeatability, stability and accuracy of two compounds by HPLC-ELSD

| Compound        | Precision (RSD, %)  |                     | Repeatability<br>(RSD, %) | Stability<br>(RSD, %) | Accuracy (n=5) |        |
|-----------------|---------------------|---------------------|---------------------------|-----------------------|----------------|--------|
|                 | Intraday<br>(n = 5) | Interday<br>(n = 5) |                           |                       | Mean           | RSD, % |
| Ginsenoside Rg1 | 1.8                 | 2.1                 | 2.5                       | 2.3                   | 99.6           | 2.3    |
| Ginsenoside Re  | 2.1                 | 2.4                 | 2.2                       | 2.4                   | 100.5          | 2.6    |

**Table S3.** The RSDs (%) of PI and RT in validation tests

| Tests            | ESI <sup>+</sup> mode |           | ESI <sup>-</sup> mode |           |
|------------------|-----------------------|-----------|-----------------------|-----------|
|                  | PI                    | RT        | PI                    | RT        |
| system stability | 1.38~3.68             | 0.32~1.25 | 1.49~3.96             | 0.24~1.82 |
| precision        | 0.84~3.38             | 0.12~0.26 | 1.64~3.32             | 0.16~0.54 |
| reproducibility  | 1.28~3.56             | 0.15~1.48 | 0.68~3.58             | 0.08~0.62 |
| Sample stability | 1.35~3.14             | 0.06~0.45 | 1.94~3.21             | 0.15~0.89 |

The abovementioned validation showed that the UPLC-QTOF-MS method was effective in terms of precision, repeatability, and stability.

**Table S4.** The consequences from metabolic pathways

| Pathway Name                             | Match<br>Status | p        | -log (p) | Holm p   | FDR      | Impact |
|------------------------------------------|-----------------|----------|----------|----------|----------|--------|
| Riboflavin metabolism                    | 1/4             | 0.0623   | 1.2055   | 1        | 0.8722   | 0.50   |
| Arachidonic acid metabolism              | 7/36            | 2.64E-08 | 7.5783   | 2.22E-06 | 2.22E-06 | 0.29   |
| Glycerophospholipid metabolism           | 6/36            | 0.0180   | 1.7450   | 1        | 0.3777   | 0.22   |
| Retinol metabolism                       | 2/16            | 0.0255   | 1.5935   | 1        | 0.4283   | 0.16   |
| Steroid hormone biosynthesis             | 5/77            | 0.0061   | 2.2173   | 0.4971   | 0.1698   | 0.15   |
| Pentose and glucuronate interconversions | 1/18            | 0.2524   | 0.5980   | 1        | 1        | 0.13   |
| Linoleic acid metabolism                 | 3/5             | 0.0024   | 2.6262   | 0.1963   | 0.0993   | 0      |
| Phenylalanine metabolism                 | 1/12            | 0.1759   | 0.7547   | 1        | 1        | 0      |
| Ether lipid metabolism                   | 1/20            | 0.2763   | 0.5587   | 1        | 1        | 0      |
| Sphingolipid metabolism                  | 1/21            | 0.2880   | 0.5407   | 1        | 1        | 0      |
| Tyrosine metabolism                      | 1/42            | 0.4955   | 0.3050   | 1        | 1        | 0      |

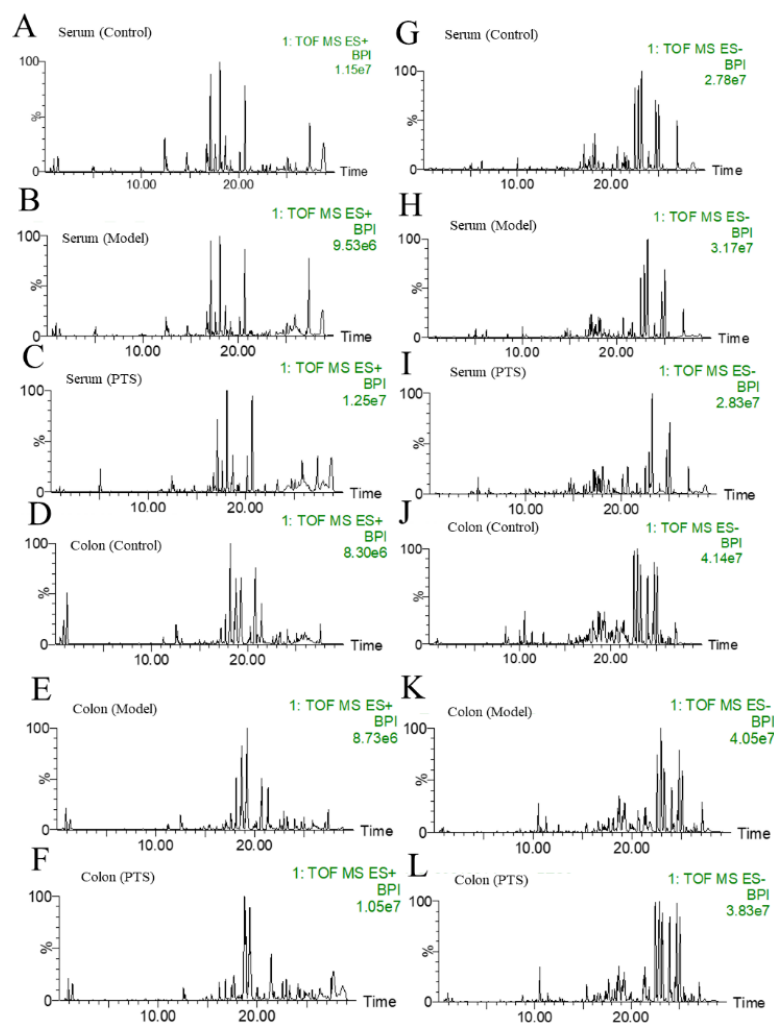

**Figure S1.** The serum and colon samples from the Control, Model, and PTS-H groups are shown in the representative BPI chromatograms in positive (A-F) and negative (G-L) modes.
